# Supplementary material for: Synthesis and spectroscopic properties of propeller type 2,4,6-tri(anthracen-9-yl)-1,3,5-triazine
Source: Royal Society of Chemistry journal article supplement (doi:10.1039/c5ra08833j), 2015-01-01
Supplement: c5ra08833j1.pdf [file c5ra08833j1.pdf]

*Electronic Supplementary Information (ESI) for:*

## **Synthesis and Spectroscopic Properties of Propeller Typed 2,4,6-Tri(anthracen-9-yl)-1,3,5-triazine**

Li Xu<sup>1</sup>, Pengfei Wang<sup>2</sup>, Juanjuan Zhang<sup>2</sup>, Wei Wu<sup>2</sup>, Jianwu Shi\*<sup>2</sup>, Jingfang Yuan<sup>1</sup>, Hui Han<sup>2</sup> and

Hua Wang\*<sup>1,2</sup>

<sup>1</sup>College of Chemistry and Chemical Engineering, Henan University, Kaifeng, 475004, China

<sup>2</sup>Key Lab for Special Functional Materials of Ministry of Education, Henan University, Kaifeng, 475004, China

### **Table of Contents:**

|                                                                         |    |
|-------------------------------------------------------------------------|----|
| 1. Materials and methods.....                                           | 1  |
| 2. Experimental Section .....                                           | 2  |
| Synthesis of <b>TAT</b> from 1,3,5-trichlorotriazine .....              | 2  |
| Synthesis of <b>TAT</b> from 2-chloro-4,6-dimethoxy-1,3,5-triazine..... | 3  |
| 3. Crystal Analysis of <b>3</b> and <b>4</b> .....                      | 7  |
| Crystal Analysis of <b>3</b> .....                                      | 7  |
| Crystal Analysis of <b>4</b> .....                                      | 12 |
| 4. Theoretical calculations of <b>TAT</b> at B3LYP/6-31G(d) level.....  | 19 |

### **1. Materials and methods**

Ether and tetrahydrofuran (THF) for use on vacuum line were freshly distilled from sodium/benzophenone prior to use. *t*-BuLi (pentane) were obtained from Energy Chemical; prior to use, its concentration was determined by titration with *N*-pivaloyl-*o*-toluidine<sup>[S1]</sup>. Column chromatography was carried out on silica gel (300-400 mesh). Analytical thin-layer chromatography was performed on glass plates of Silica Gel GF-254 with detection by UV. Standard techniques for synthesis under inert atmosphere, using gasbag and Schlenk glassware equipped with an 8-mm PTFE vacuum stop-cock (Synthware) were employed. All starting materials and reagents were commercially available. <sup>1</sup>H-NMR and <sup>13</sup>C-NMR spectra were recorded on a Bruker AVANCE 400M spectrometer. The chemical shift references were as following: (<sup>1</sup>H) CDCl<sub>3</sub>, 7.26 ppm (CHCl<sub>3</sub>); (<sup>13</sup>C) CDCl<sub>3</sub>, 77.00 ppm (CDCl<sub>3</sub>). IR spectra were obtained using an FT-IR instrument (Nicolet, AVATAR360). HRMS analysis was carried out at

Micromass GCT (TOF MS EI<sup>+</sup>). Melting point determination was taken on a Melt-Temp apparatus (X-6) from Beijing Fukai Instrument Plant and was uncorrected. Absorption spectra were recorded using a Lambda 35 (Perk Elmer) spectrophotometer. Emission spectroscopy was carried out using a Fluoro SENS-9000 luminescence spectrometer. The fluorescence lifetimes were measured on a Combined Fluorescence Lifetime and Steady State Spectrometer (FLS920) with  $\lambda_{\text{ex}} = 367.4$  nm and pulse width of 875.8 ps. The concentrations of **TAT**, **3** and **4** are 1E-5 M in THF at room temperature. Suprasil quartz cells with a 10-mm optical path were employed in all these experiments. Low-temperature fluorescence experiments were performed using a quartz Dewar and 5-mm NMR quartz tubes. Fluorescence quantum yield was determined by the steady-state fluorescence using quinine sulfate as standard ( $\Phi_f = 0.546$  in 0.1 N sulphuric acid)<sup>[s2]</sup>.

## 2. Experimental Section

The synthetic work of Scheme 1 and 2 in manuscript has been carried out. The data are listed in Table 1 and Table 2. The following gives the synthetic procedure using PdCl<sub>2</sub>(dppf)<sub>2</sub> as examples.

### 2.1 The synthesis of 2,4,6-tri(anthracen-9-yl)-1,3,5-triazine (**TAT**) from 1,3,5-trichlorotriazine with PdCl<sub>2</sub>(dppf)<sub>2</sub> as example. (Entry 1, Table 1)

To a solution of 9-bromoanthracene (600 mg, 2.33 mmol, 3.3 equiv) in anhyd THF (30 mL), *t*-BuLi (1.5 M in pentane, 3.11 mL, 6.6 equiv) was added dropwise at -78 °C. The reaction mixture was kept at -78 °C for 2 h and warmed slowly to 0 °C. Then, 1,3,5-trichlorotriazine (130 mg, 0.71 mmol, 1 equiv), PdCl<sub>2</sub> (0.03 equiv) and dppf (0.06 equiv) were added under argon atmosphere. The reaction mixture was warmed slowly to ambient temperature first and then refluxed at 80 °C overnight. After the reaction mixture was quenched with water, the organic layer was separated, and the aqueous layer was extracted with CHCl<sub>3</sub> (3×50 mL). The combined organic layer was dried over MgSO<sub>4</sub> and purified by silica gel column chromatography with petroleum ether (60-90 °C)-CHCl<sub>3</sub> (1:1, v/v) as eluent to give 208 mg of **TAT** in 48% yield as yellow solid. From another reaction on 800 mg scale of **3**, 281 mg (49 %) of **TAT** was obtained. Mp > 300 °C; <sup>1</sup>H-NMR (400 MHz, CDCl<sub>3</sub>)  $\delta$  8.63 (3H, s), 8.19 (6H, d,  $J = 8.8$  Hz), 8.08 (6H, d,  $J = 8.4$  Hz), 7.60 (6H, t,  $J = 7.6$  Hz), 7.51 (6H, t,  $J = 7.4$  Hz); <sup>13</sup>C-NMR (100MHz, CDCl<sub>3</sub>):  $\delta$  176.44, 131.28, 130.53, 129.84, 129.75, 128.95, 127.24, 125.37, 124.85; IR (KBr): 3051 (C-H) cm<sup>-1</sup>. HRMS (TOF MS EI<sup>+</sup>) *m/z* calcd for [C<sub>45</sub>H<sub>27</sub>N<sub>3</sub>] 609.2205, found 609.2210.

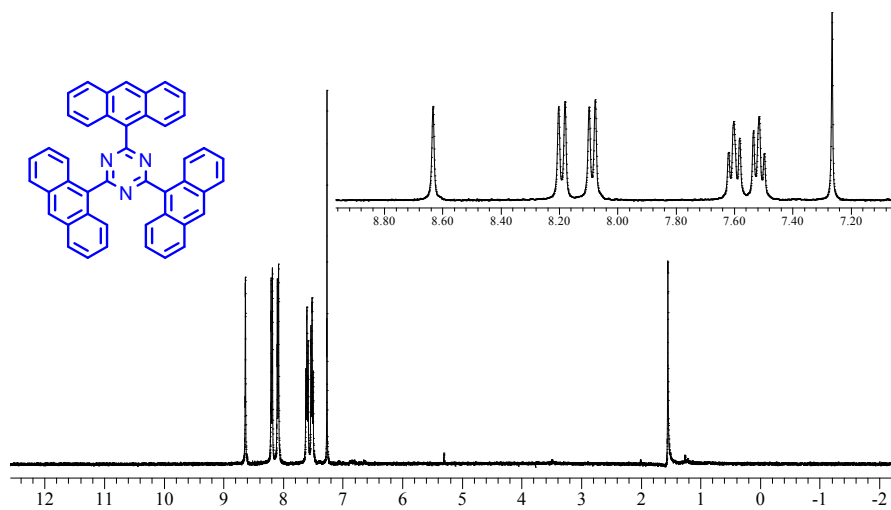

<sup>1</sup>H NMR (400 MHz, CDCl<sub>3</sub>) of TAT

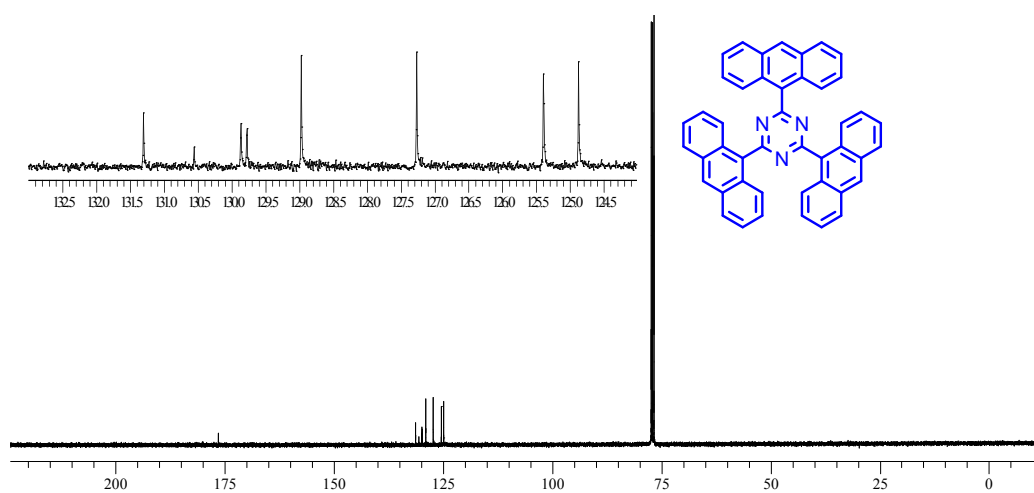

<sup>13</sup>C NMR (100 MHz, CDCl<sub>3</sub>) of TAT

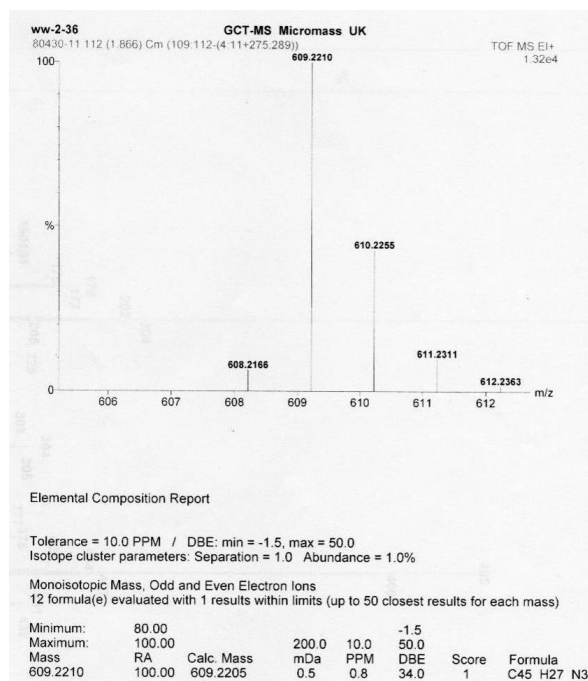

HRMS spectrum of TAT

## 2.2 The synthesis of 2,4,6-tri(anthracen-9-yl)-1,3,5-triazine (TAT) from 2-chloro-4,6-dimethoxy-1,3,5-triazine and 1.0 equiv 9-bromo-anthracene with PdCl<sub>2</sub>(dppf)<sub>2</sub> as example (Entry 1, Table 2)

To a solution of 9-bromoanthracene (355.5 mg, 1.38 mmol, 1.0 equiv) in anhyd THF (50 mL), *t*-BuLi (1.67 M in pentane, 1.8 mL, 2.2 equiv) was added dropwise at -78 °C. The reaction mixture was kept at -78 °C for 2 h, then 2-chloro-4,6-dimethoxy-1,3,5-triazine (242.7 mg, 1.38 mmol, 1.0 equiv), PdCl<sub>2</sub> (0.01 equiv) and dppf (0.02 equiv) were added under argon atmosphere at -78 °C. The reaction mixture was warmed slowly to ambient temperature for 24 h. After the reaction mixture was quenched with water at 0 °C, the solvent was removed by rotary evaporator. The reaction mixture then were extracted with CHCl<sub>3</sub> (60 mL), washed by water (3×100 mL), dried over MgSO<sub>4</sub> and purified by silica gel column chromatography with petroleum ether (60-90 °C)-CHCl<sub>3</sub> (1:1, v/v) as eluent to give 145.6 mg (33 %) of **3** as light yellow solid. In addition, 90.7 mg (28 %) of **4** as yellow solid and 17.0 mg (6 %) of TAT were obtained at same time.

For **3**: Mp. 211-212 °C. <sup>1</sup>H NMR (400 MHz, CDCl<sub>3</sub>) δ 8.57 (1 H, s), 8.02-8.08 (2 H, m), 7.76-7.82 (2 H, m), 7.42-7.50 (4 H, m), 4.14 (6 H, s); <sup>13</sup>C NMR (100 MHz, CDCl<sub>3</sub>) δ 178.61, 172.78, 131.10, 130.84, 129.06, 128.97, 128.57, 126.56, 125.23, 125.11, 55.60; IR (KBr): 3045 (C-H) 1357, 1082 (C-O-C) cm<sup>-1</sup>; HRMS (Tesla FTMS) m/z calcd for [C<sub>19</sub>H<sub>15</sub>N<sub>3</sub>O<sub>2</sub>] 317.1164, found 318.1237 (M<sup>+</sup>+1).

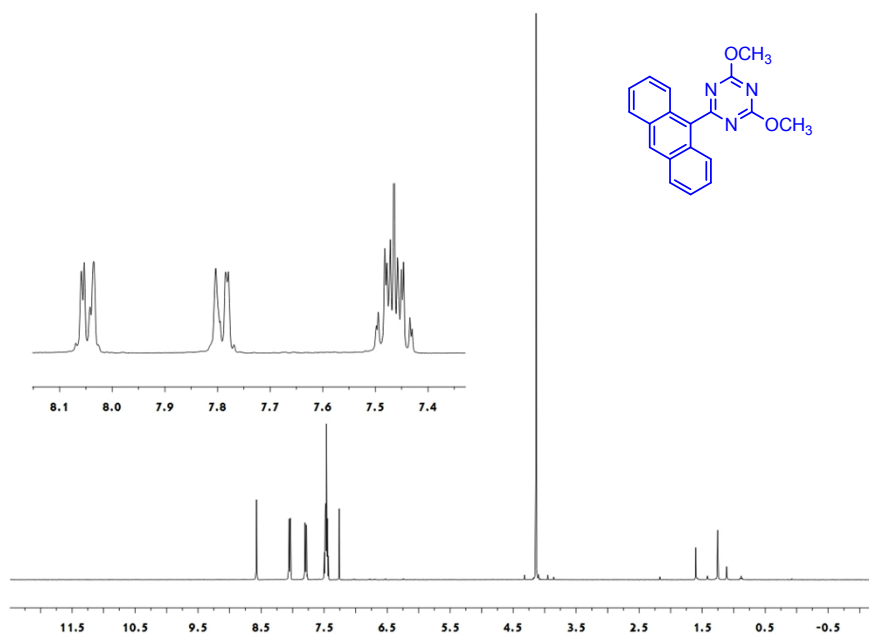

<sup>1</sup>H NMR (400 MHz, CDCl<sub>3</sub>) of **3**

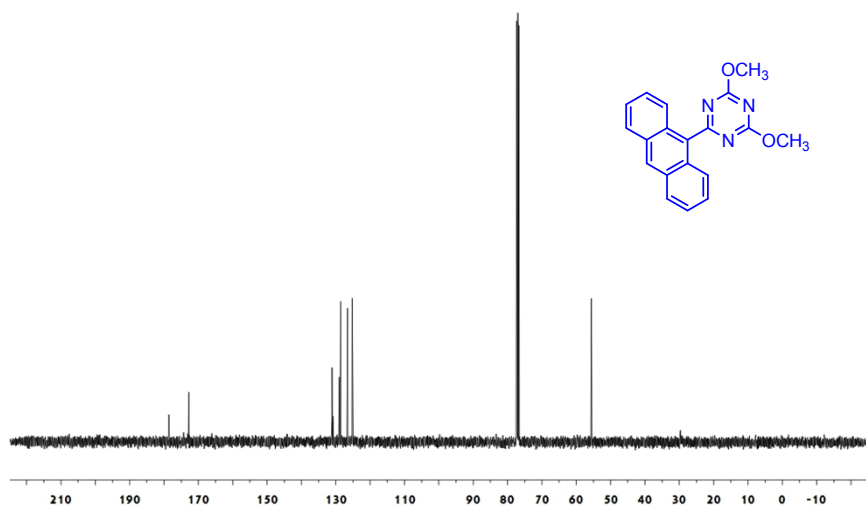

<sup>13</sup>C NMR (100 MHz, CDCl<sub>3</sub>) of **3**

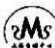

Instrument: IonSpec 4.7 Tesla FTMS

Card Serial Number: W112 0251

Sample Serial Number: ZJJ-1-28-co3-co-R

Operator: HuaQin Date: 2012/01/11

Operation Mode: MALDI/DHB

**Elemental Composition Search Report:**

Target Mass:  
Target m/z = 318.1233 ± 0.002  
Charge = +1

**Possible Elements:**

| Element | Exact Mass | Min | Max |
|---------|------------|-----|-----|
| C       | 12.000000  | 0   | 100 |
| H       | 1.007825   | 0   | 100 |
| N       | 14.003074  | 0   | 5   |
| O       | 15.994815  | 0   | 5   |

Additional Search Restrictions:  
DBE Limit Mode = Both Integer and Half-integer  
Minimum DBE = 0

**Search Results:**

Number of Hits = 2

| m/z       | Delta m/z | DBE  | Formula                                                                     |
|-----------|-----------|------|-----------------------------------------------------------------------------|
| 318.12370 | -0.00040  | 13.5 | C <sub>31</sub> H <sub>18</sub> N <sub>4</sub> O <sub>2</sub> <sup>+1</sup> |
| 318.12505 | -0.00175  | 13.0 | C <sub>21</sub> H <sub>16</sub> O <sub>3</sub> <sup>+1</sup>                |

HRMS spectrum of **3**

For **4**: Mp. 261-262 °C. <sup>1</sup>H NMR (400 MHz, CDCl<sub>3</sub>) δ 8.59 (2 H, s), 8.06 (4 H, d, *J* = 8.0 Hz), 7.78 (4 H, d, *J* = 8.4 Hz), 7.47-7.54 (8 H, m), 4.26 (3 H, s); <sup>13</sup>C NMR (100 MHz, CDCl<sub>3</sub>) δ 177.81, 171.66, 131.17, 130.67, 129.39, 129.34, 128.74, 126.87, 125.28, 124.98, 55.85; IR (KBr): 3049 (C-H), 1348, 1126 (C-O-C) cm<sup>-1</sup>, HRMS (Tesla FTMS) m/z calcd for [C<sub>32</sub>H<sub>22</sub>N<sub>3</sub>O] 464.1744, found 464.1757.

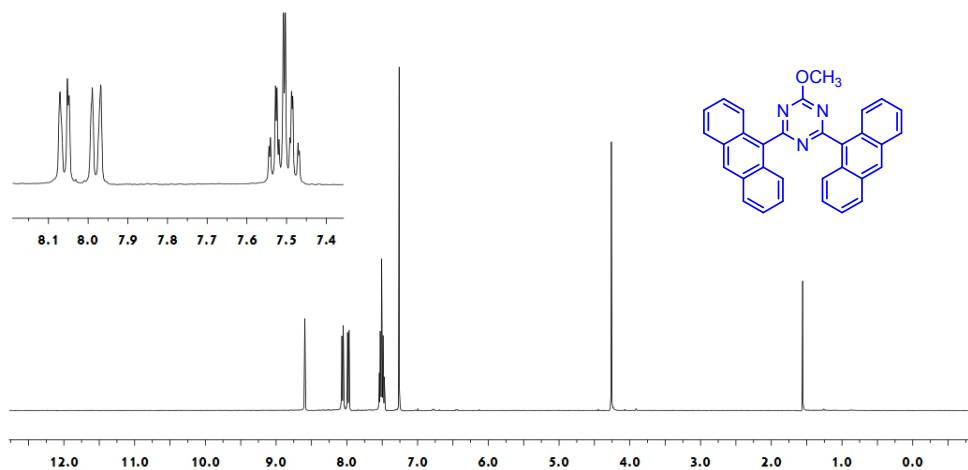

<sup>1</sup>H NMR (400 MHz, CDCl<sub>3</sub>) of **4**

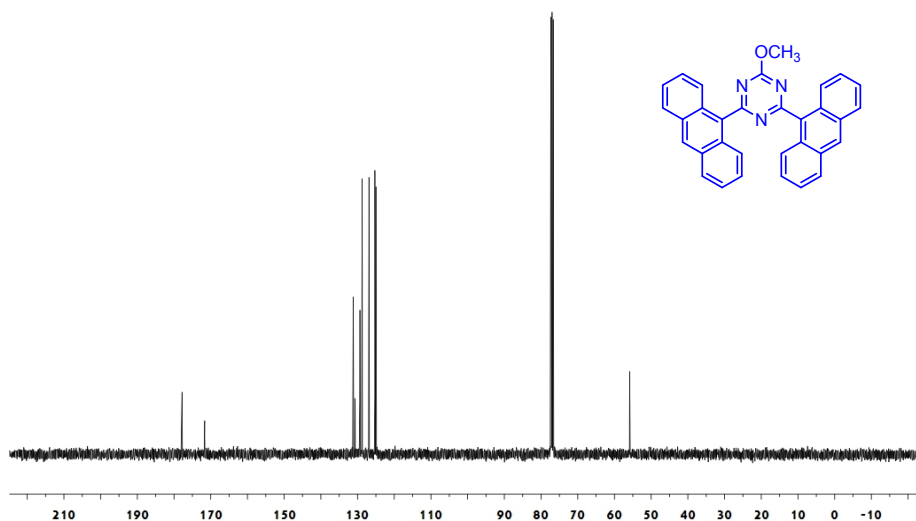

$^{13}\text{C}$  NMR (100 MHz,  $\text{CDCl}_3$ ) of **4**

Shanghai Mass Spectrometry Center  
Shanghai Institute of Organic Chemistry  
Chinese Academy of Sciences  
High Resolution MS DATA REPORT

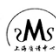

Instrument: IonSpec 4.7 Tesla FTMS  
Card Serial Number: W112.0413  
Sample Serial Number: zjj-1-36-col2-col2-c  
Operator: HuaQin Date: 2012/03/22  
Operation Mode: MALDI/DHB

**Elemental Composition Search Report:**

Target Mass:  
Target m/z = 464.1744 ± 0.003  
Charge = +1

**Possible Elements:**

| Element | Exact Mass | Min | Max |
|---------|------------|-----|-----|
| C       | 12.000000  | 0   | 100 |
| H       | 1.007825   | 0   | 100 |
| N       | 14.003074  | 0   | 5   |
| O       | 15.994915  | 0   | 5   |

**Additional Search Restrictions:**

DBE Limit Mode = Both Integer and Half-integer  
Minimum DBE = 0

**Search Results:**

Number of Hits = 4

| m/z       | Delta m/z | DBE  | Formula                                             |
|-----------|-----------|------|-----------------------------------------------------|
| 464.17574 | -0.00134  | 23.5 | $\text{C}_{32}\text{H}_{22}\text{N}_4\text{O}^+1$   |
| 464.17306 | 0.00134   | 19.0 | $\text{C}_{28}\text{H}_{16}\text{N}_4\text{O}_2^+1$ |
| 464.17708 | -0.00268  | 23.0 | $\text{C}_{34}\text{H}_{22}\text{O}_2^+1$           |
| 464.17172 | 0.00268   | 19.5 | $\text{C}_{27}\text{H}_{12}\text{N}_4\text{O}_3^+1$ |

HRMS data of **4**

**2.3 The synthesis of 2,4,6-tri(anthracen-9-yl)-1,3,5-triazine (TAT) from 2-chloro-4,6-dimethoxy-1,3,5-triazine and 2.0 equiv 9-bromo-anthracene with  $\text{PdCl}_2(\text{dppf})_2$  as example (Entry 2, Table 2)**

Same procedure to the case of Entry 1, Table 2 was employed. The only difference is that 2.0 equiv 9-bromoanthracene and 4.4 equiv of *t*-BuLi were used for the reaction. On the scale of 44.9 mg (1.0 equiv) of 2-chloro-4,6-dimethoxy-1,3,5-triazine, 29.0 mg of **4** (28 %) and 13.6 mg of TAT (11 %) were obtained. In addition, a trace of **3** (2.0 mg, 1 %) was achieved at same time.

**2.4 The synthesis of 2,4,6-tri(anthracen-9-yl)-1,3,5-triazine (TAT) from 2-chloro-4,6-**

**dimethoxy-1,3,5-triazine and 3.0 equiv 9-bromo-anthracene with PdCl<sub>2</sub>(dppf)<sub>2</sub> as example (Entry 3, Table 2)**

Same procedure to the case of Entry 2, Table 2 was employed. The only difference is that 3.0 equiv 9-bromoanthracene and 6.6 equiv of *t*-BuLi were used for the reaction. On the scale of 57.6 mg (1.0 equiv) of 2-chloro-4,6-dimethoxy-1,3,5-triazine, 78.9 mg (40 %) of **TAT** was obtained.

**3. Crystal Analysis of 3 and 4**

Table 1. Crystal data and structure refinement for **3**.

|                                   |                                                                                                                                      |
|-----------------------------------|--------------------------------------------------------------------------------------------------------------------------------------|
| Identification code               | <b>3</b>                                                                                                                             |
| Empirical formula                 | C <sub>19</sub> H <sub>15</sub> N <sub>3</sub> O <sub>2</sub>                                                                        |
| Formula weight                    | 317.34                                                                                                                               |
| Temperature                       | 296(2) K                                                                                                                             |
| Wavelength                        | 0.71073 Å                                                                                                                            |
| Crystal system, space group       | Triclinic, P-1                                                                                                                       |
| Unit cell dimensions              | a = 8.2169(8) Å    alpha = 65.807(2) deg.<br>b = 9.6220(9) Å    beta = 72.714(2) deg.<br>c = 11.5715(11) Å    gamma = 89.496(2) deg. |
| Volume                            | 790.10(13) Å <sup>3</sup>                                                                                                            |
| Z, Calculated density             | 2, 1.334 Mg/m <sup>3</sup>                                                                                                           |
| Absorption coefficient            | 0.089 mm <sup>-1</sup>                                                                                                               |
| F(000)                            | 332                                                                                                                                  |
| Crystal size                      | 0.52 x 0.42 x 0.37 mm                                                                                                                |
| Theta range for data collection   | 2.04 to 25.00 deg.                                                                                                                   |
| Limiting indices                  | -8<=h<=9, -11<=k<=11, -13<=l<=13                                                                                                     |
| Reflections collected / unique    | 3946 / 2752 [R(int) = 0.0096]                                                                                                        |
| Completeness to theta = 25.00     | 98.9 %                                                                                                                               |
| Absorption correction             | None                                                                                                                                 |
| Max. and min. transmission        | 0.9678 and 0.9552                                                                                                                    |
| Refinement method                 | Full-matrix least-squares on F <sup>2</sup>                                                                                          |
| Data / restraints / parameters    | 2752 / 0 / 217                                                                                                                       |
| Goodness-of-fit on F <sup>2</sup> | 1.047                                                                                                                                |
| Final R indices [I>2sigma(I)]     | R1 = 0.0403, wR2 = 0.1062                                                                                                            |
| R indices (all data)              | R1 = 0.0578, wR2 = 0.1142                                                                                                            |
| Largest diff. peak and hole       | 0.104 and -0.209 e.Å <sup>-3</sup>                                                                                                   |

Table 2. Atomic coordinates ( x 10<sup>4</sup>) and equivalent isotropic displacement parameters (Å<sup>2</sup> x 10<sup>3</sup>) for A. U(eq) is defined as one third of the trace of the orthogonalized U<sub>ij</sub> tensor.

|  | x | y | z | U(eq) |
|--|---|---|---|-------|
|--|---|---|---|-------|



|       |          |          |          |       |
|-------|----------|----------|----------|-------|
| N(1)  | 167(2)   | 1479(1)  | 5645(1)  | 48(1) |
| C(19) | 2075(2)  | -2348(2) | 9334(1)  | 38(1) |
| C(7)  | 1614(2)  | -3737(2) | 8067(1)  | 38(1) |
| C(3)  | -923(2)  | 224(2)   | 6511(1)  | 41(1) |
| O(2)  | 2836(1)  | 2651(1)  | 4880(1)  | 60(1) |
| N(3)  | -584(1)  | -1046(1) | 7405(1)  | 40(1) |
| C(6)  | 1584(2)  | -2399(2) | 8287(1)  | 37(1) |
| C(14) | 2629(2)  | -3684(2) | 10185(2) | 43(1) |
| C(12) | 2181(2)  | -5058(2) | 8927(1)  | 42(1) |
| O(1)  | -2508(1) | 309(1)   | 6439(1)  | 55(1) |
| N(2)  | 2283(2)  | 194(1)   | 6544(1)  | 43(1) |
| C(4)  | 1735(2)  | 1384(2)  | 5730(1)  | 43(1) |
| C(5)  | 1064(2)  | -1001(2) | 7361(1)  | 37(1) |
| C(8)  | 1147(2)  | -3833(2) | 7009(2)  | 46(1) |
| C(18) | 2028(2)  | -1033(2) | 9608(2)  | 48(1) |
| C(13) | 2665(2)  | -4991(2) | 9959(2)  | 48(1) |
| C(17) | 2524(2)  | -1034(2) | 10624(2) | 60(1) |
| C(9)  | 1228(2)  | -5137(2) | 6827(2)  | 56(1) |
| C(10) | 1773(2)  | -6430(2) | 7678(2)  | 61(1) |
| C(16) | 3085(2)  | -2344(2) | 11453(2) | 67(1) |
| C(11) | 2233(2)  | -6401(2) | 8691(2)  | 56(1) |
| C(15) | 3130(2)  | -3620(2) | 11245(2) | 59(1) |
| C(2)  | 4583(2)  | 2678(2)  | 4890(2)  | 77(1) |
| C(1)  | -3785(2) | -990(2)  | 7342(2)  | 62(1) |

Table 3. Bond lengths [Å] and angles [deg] for A.

|             |            |
|-------------|------------|
| N(1)-C(4)   | 1.3204(19) |
| N(1)-C(3)   | 1.3265(19) |
| C(19)-C(6)  | 1.4052(19) |
| C(19)-C(18) | 1.422(2)   |
| C(19)-C(14) | 1.431(2)   |
| C(7)-C(6)   | 1.4096(19) |
| C(7)-C(8)   | 1.425(2)   |
| C(7)-C(12)  | 1.433(2)   |
| C(3)-N(3)   | 1.3304(18) |
| C(3)-O(1)   | 1.3290(17) |
| O(2)-C(4)   | 1.3339(17) |
| O(2)-C(2)   | 1.440(2)   |
| N(3)-C(5)   | 1.3398(17) |
| C(6)-C(5)   | 1.4898(19) |
| C(14)-C(13) | 1.385(2)   |

|                   |            |
|-------------------|------------|
| C(14)-C(15)       | 1.428(2)   |
| C(12)-C(13)       | 1.389(2)   |
| C(12)-C(11)       | 1.423(2)   |
| O(1)-C(1)         | 1.4336(19) |
| N(2)-C(4)         | 1.3272(18) |
| N(2)-C(5)         | 1.3367(17) |
| C(8)-C(9)         | 1.353(2)   |
| C(8)-H(8A)        | 0.9300     |
| C(18)-C(17)       | 1.353(2)   |
| C(18)-H(18A)      | 0.9300     |
| C(13)-H(13A)      | 0.9300     |
| C(17)-C(16)       | 1.408(2)   |
| C(17)-H(17A)      | 0.9300     |
| C(9)-C(10)        | 1.402(2)   |
| C(9)-H(9A)        | 0.9300     |
| C(10)-C(11)       | 1.346(2)   |
| C(10)-H(10A)      | 0.9300     |
| C(16)-C(15)       | 1.343(2)   |
| C(16)-H(16A)      | 0.9300     |
| C(11)-H(11A)      | 0.9300     |
| C(15)-H(15A)      | 0.9300     |
| C(2)-H(2A)        | 0.9600     |
| C(2)-H(2B)        | 0.9600     |
| C(2)-H(2C)        | 0.9600     |
| C(1)-H(1A)        | 0.9600     |
| C(1)-H(1B)        | 0.9600     |
| C(1)-H(1C)        | 0.9600     |
| C(4)-N(1)-C(3)    | 113.08(12) |
| C(6)-C(19)-C(18)  | 123.20(13) |
| C(6)-C(19)-C(14)  | 118.95(13) |
| C(18)-C(19)-C(14) | 117.85(13) |
| C(6)-C(7)-C(8)    | 123.22(13) |
| C(6)-C(7)-C(12)   | 118.70(13) |
| C(8)-C(7)-C(12)   | 118.06(13) |
| N(1)-C(3)-N(3)    | 127.07(13) |
| N(1)-C(3)-O(1)    | 113.62(13) |
| N(3)-C(3)-O(1)    | 119.31(13) |
| C(4)-O(2)-C(2)    | 118.39(13) |
| C(3)-N(3)-C(5)    | 113.57(12) |
| C(19)-C(6)-C(7)   | 121.38(13) |
| C(19)-C(6)-C(5)   | 119.70(12) |
| C(7)-C(6)-C(5)    | 118.90(12) |
| C(13)-C(14)-C(15) | 122.12(14) |
| C(13)-C(14)-C(19) | 119.33(13) |

|                    |            |
|--------------------|------------|
| C(15)-C(14)-C(19)  | 118.55(14) |
| C(13)-C(12)-C(11)  | 122.17(14) |
| C(13)-C(12)-C(7)   | 119.30(13) |
| C(11)-C(12)-C(7)   | 118.53(14) |
| C(3)-O(1)-C(1)     | 117.84(12) |
| C(4)-N(2)-C(5)     | 113.93(12) |
| N(1)-C(4)-N(2)     | 127.10(14) |
| N(1)-C(4)-O(2)     | 113.63(13) |
| N(2)-C(4)-O(2)     | 119.27(13) |
| N(2)-C(5)-N(3)     | 125.22(13) |
| N(2)-C(5)-C(6)     | 117.29(12) |
| N(3)-C(5)-C(6)     | 117.48(12) |
| C(9)-C(8)-C(7)     | 120.88(15) |
| C(9)-C(8)-H(8A)    | 119.6      |
| C(7)-C(8)-H(8A)    | 119.6      |
| C(17)-C(18)-C(19)  | 121.15(15) |
| C(17)-C(18)-H(18A) | 119.4      |
| C(19)-C(18)-H(18A) | 119.4      |
| C(14)-C(13)-C(12)  | 122.34(14) |
| C(14)-C(13)-H(13A) | 118.8      |
| C(12)-C(13)-H(13A) | 118.8      |
| C(18)-C(17)-C(16)  | 120.96(16) |
| C(18)-C(17)-H(17A) | 119.5      |
| C(16)-C(17)-H(17A) | 119.5      |
| C(8)-C(9)-C(10)    | 120.81(16) |
| C(8)-C(9)-H(9A)    | 119.6      |
| C(10)-C(9)-H(9A)   | 119.6      |
| C(11)-C(10)-C(9)   | 120.74(15) |
| C(11)-C(10)-H(10A) | 119.6      |
| C(9)-C(10)-H(10A)  | 119.6      |
| C(15)-C(16)-C(17)  | 120.12(16) |
| C(15)-C(16)-H(16A) | 119.9      |
| C(17)-C(16)-H(16A) | 119.9      |
| C(10)-C(11)-C(12)  | 120.98(15) |
| C(10)-C(11)-H(11A) | 119.5      |
| C(12)-C(11)-H(11A) | 119.5      |
| C(16)-C(15)-C(14)  | 121.36(16) |
| C(16)-C(15)-H(15A) | 119.3      |
| C(14)-C(15)-H(15A) | 119.3      |
| O(2)-C(2)-H(2A)    | 109.5      |
| O(2)-C(2)-H(2B)    | 109.5      |
| H(2A)-C(2)-H(2B)   | 109.5      |
| O(2)-C(2)-H(2C)    | 109.5      |
| H(2A)-C(2)-H(2C)   | 109.5      |

|                  |       |
|------------------|-------|
| H(2B)-C(2)-H(2C) | 109.5 |
| O(1)-C(1)-H(1A)  | 109.5 |
| O(1)-C(1)-H(1B)  | 109.5 |
| H(1A)-C(1)-H(1B) | 109.5 |
| O(1)-C(1)-H(1C)  | 109.5 |
| H(1A)-C(1)-H(1C) | 109.5 |
| H(1B)-C(1)-H(1C) | 109.5 |

---

Symmetry transformations used to generate equivalent atoms:

Table 4. Anisotropic displacement parameters ( $\text{\AA}^2 \times 10^3$ ) for A. The anisotropic displacement factor exponent takes the form:  $-2 \pi^2 [ h^2 a^{*2} U_{11} + \dots + 2 h k a^* b^* U_{12} ]$

|       | U11   | U22   | U33   | U23    | U13    | U12    |
|-------|-------|-------|-------|--------|--------|--------|
| N(1)  | 48(1) | 46(1) | 44(1) | -12(1) | -18(1) | 10(1)  |
| C(19) | 32(1) | 39(1) | 41(1) | -16(1) | -12(1) | 6(1)   |
| C(7)  | 31(1) | 40(1) | 38(1) | -15(1) | -7(1)  | 4(1)   |
| C(3)  | 41(1) | 47(1) | 42(1) | -22(1) | -17(1) | 14(1)  |
| O(2)  | 54(1) | 48(1) | 56(1) | -7(1)  | -10(1) | -3(1)  |
| N(3)  | 38(1) | 41(1) | 42(1) | -17(1) | -16(1) | 9(1)   |
| C(6)  | 30(1) | 39(1) | 39(1) | -15(1) | -10(1) | 6(1)   |
| C(14) | 40(1) | 46(1) | 43(1) | -17(1) | -16(1) | 10(1)  |
| C(12) | 39(1) | 39(1) | 44(1) | -16(1) | -9(1)  | 6(1)   |
| O(1)  | 41(1) | 61(1) | 60(1) | -19(1) | -25(1) | 14(1)  |
| N(2)  | 39(1) | 41(1) | 43(1) | -15(1) | -12(1) | 5(1)   |
| C(4)  | 46(1) | 41(1) | 38(1) | -14(1) | -10(1) | 5(1)   |
| C(5)  | 38(1) | 40(1) | 38(1) | -20(1) | -13(1) | 8(1)   |
| C(8)  | 47(1) | 48(1) | 44(1) | -21(1) | -15(1) | 6(1)   |
| C(18) | 53(1) | 44(1) | 50(1) | -22(1) | -18(1) | 11(1)  |
| C(13) | 51(1) | 43(1) | 49(1) | -14(1) | -21(1) | 15(1)  |
| C(17) | 72(1) | 60(1) | 63(1) | -36(1) | -28(1) | 11(1)  |
| C(9)  | 64(1) | 59(1) | 54(1) | -31(1) | -19(1) | 5(1)   |
| C(10) | 77(1) | 47(1) | 65(1) | -34(1) | -15(1) | 7(1)   |
| C(16) | 78(1) | 80(1) | 64(1) | -41(1) | -38(1) | 16(1)  |
| C(11) | 65(1) | 39(1) | 57(1) | -19(1) | -15(1) | 10(1)  |
| C(15) | 64(1) | 66(1) | 53(1) | -23(1) | -33(1) | 18(1)  |
| C(2)  | 52(1) | 70(1) | 85(1) | -19(1) | -7(1)  | -12(1) |
| C(1)  | 40(1) | 73(1) | 71(1) | -26(1) | -22(1) | 3(1)   |

Table 5. Hydrogen coordinates ( $\times 10^4$ ) and isotropic displacement parameters ( $\text{\AA}^2 \times 10^3$ ) for

A.

|        | x     | y     | z     | U(eq) |
|--------|-------|-------|-------|-------|
| H(8A)  | 780   | -2987 | 6435  | 55    |
| H(18A) | 1650  | -159  | 9081  | 58    |
| H(13A) | 3025  | -5856 | 10516 | 58    |
| H(17A) | 2494  | -156  | 10777 | 72    |
| H(9A)  | 919   | -5176 | 6129  | 68    |
| H(10A) | 1816  | -7318 | 7540  | 74    |
| H(16A) | 3425  | -2325 | 12145 | 80    |
| H(11A) | 2590  | -7270 | 9246  | 67    |
| H(15A) | 3495  | -4481 | 11803 | 70    |
| H(2A)  | 5225  | 3654  | 4238  | 115   |
| H(2B)  | 5094  | 1875  | 4678  | 115   |
| H(2C)  | 4596  | 2522  | 5762  | 115   |
| H(1A)  | -4865 | -779  | 7190  | 93    |
| H(1B)  | -3901 | -1184 | 8247  | 93    |
| H(1C)  | -3442 | -1875 | 7194  | 93    |

Table 1. Crystal data and structure refinement for **4**.

|                                 |                                                                                                                      |
|---------------------------------|----------------------------------------------------------------------------------------------------------------------|
| Identification code             | <b>4</b>                                                                                                             |
| Empirical formula               | C <sub>32</sub> H <sub>21</sub> N <sub>3</sub> O                                                                     |
| Formula weight                  | 463.52                                                                                                               |
| Temperature                     | 296(2) K                                                                                                             |
| Wavelength                      | 0.71073 Å                                                                                                            |
| Crystal system, space group     | Monoclinic, P2(1)/n                                                                                                  |
| Unit cell dimensions            | a = 7.930(3) Å    alpha = 90 deg.<br>b = 17.081(7) Å    beta = 100.949(8) deg.<br>c = 17.894(7) Å    gamma = 90 deg. |
| Volume                          | 2379.6(17) Å <sup>3</sup>                                                                                            |
| Z, Calculated density           | 4, 1.294 Mg/m <sup>3</sup>                                                                                           |
| Absorption coefficient          | 0.079 mm <sup>-1</sup>                                                                                               |
| F(000)                          | 968                                                                                                                  |
| Crystal size                    | 0.50 x 0.17 x 0.13 mm                                                                                                |
| Theta range for data collection | 1.66 to 28.13 deg.                                                                                                   |
| Limiting indices                | -10 ≤ h ≤ 10, -12 ≤ k ≤ 22, -23 ≤ l ≤ 21                                                                             |
| Reflections collected / unique  | 14365 / 5654 [R(int) = 0.0741]                                                                                       |
| Completeness to theta = 28.13   | 97.1 %                                                                                                               |
| Absorption correction           | None                                                                                                                 |
| Max. and min. transmission      | 0.9898 and 0.9614                                                                                                    |
| Refinement method               | Full-matrix least-squares on F <sup>2</sup>                                                                          |
| Data / restraints / parameters  | 5654 / 0 / 325                                                                                                       |

|                                      |                                       |
|--------------------------------------|---------------------------------------|
| Goodness-of-fit on $F^2$             | 0.926                                 |
| Final R indices [ $I > 2\sigma(I)$ ] | $R1 = 0.0567$ , $wR2 = 0.1171$        |
| R indices (all data)                 | $R1 = 0.1587$ , $wR2 = 0.1544$        |
| Largest diff. peak and hole          | 0.188 and -0.203 e. $\text{\AA}^{-3}$ |

Table 2. Atomic coordinates ( $\times 10^4$ ) and equivalent isotropic displacement parameters ( $\text{\AA}^2 \times 10^3$ ) for A.  $U(\text{eq})$  is defined as one third of the trace of the orthogonalized  $U_{ij}$  tensor.

|       | x        | y       | z        | $U(\text{eq})$ |
|-------|----------|---------|----------|----------------|
| O     | 8311(2)  | 1024(1) | 1494(1)  | 53(1)          |
| N(2)  | 9128(2)  | 1503(1) | 415(1)   | 40(1)          |
| C(19) | 10058(3) | 2072(1) | -687(1)  | 38(1)          |
| C(3)  | 9269(3)  | 2158(1) | 6(1)     | 37(1)          |
| C(2)  | 8448(3)  | 1622(1) | 1028(1)  | 39(1)          |
| N(3)  | 8774(2)  | 2873(1) | 180(1)   | 43(1)          |
| C(20) | 9167(3)  | 2368(1) | -1393(1) | 40(1)          |
| N(1)  | 7861(2)  | 2300(1) | 1251(1)  | 46(1)          |
| C(27) | 12495(3) | 1692(1) | -1282(1) | 44(1)          |
| C(4)  | 8065(3)  | 2909(1) | 806(1)   | 40(1)          |
| C(31) | 12687(3) | 1412(1) | 70(1)    | 51(1)          |
| C(5)  | 7457(3)  | 3685(1) | 1029(1)  | 45(1)          |
| C(32) | 11711(3) | 1722(1) | -620(1)  | 41(1)          |
| C(25) | 9972(3)  | 2316(1) | -2048(1) | 44(1)          |
| C(26) | 11603(3) | 1990(1) | -1972(1) | 51(1)          |
| C(18) | 8616(4)  | 4168(1) | 1525(1)  | 49(1)          |
| C(28) | 14156(3) | 1349(2) | -1221(2) | 58(1)          |
| C(22) | 6654(3)  | 2941(2) | -2198(1) | 55(1)          |
| C(24) | 9063(4)  | 2594(2) | -2766(1) | 55(1)          |
| C(6)  | 5750(3)  | 3919(1) | 765(1)   | 49(1)          |
| C(13) | 8030(4)  | 4899(2) | 1777(2)  | 63(1)          |
| C(11) | 5168(4)  | 4656(2) | 1013(2)  | 61(1)          |
| C(29) | 15019(3) | 1058(2) | -554(2)  | 63(1)          |
| C(21) | 7479(3)  | 2693(1) | -1502(1) | 49(1)          |
| C(30) | 14273(3) | 1093(2) | 103(2)   | 57(1)          |
| C(23) | 7466(4)  | 2890(2) | -2838(1) | 59(1)          |
| C(17) | 10367(4) | 3961(2) | 1791(1)  | 60(1)          |
| C(7)  | 4555(4)  | 3459(2) | 246(2)   | 60(1)          |
| C(14) | 9217(6)  | 5382(2) | 2282(2)  | 81(1)          |
| C(12) | 6325(5)  | 5115(2) | 1517(2)  | 71(1)          |
| C(1)  | 8940(4)  | 268(1)  | 1313(2)  | 67(1)          |
| C(10) | 3439(5)  | 4891(2) | 722(2)   | 81(1)          |
| C(15) | 10860(6) | 5146(2) | 2519(2)  | 89(1)          |
| C(16) | 11453(4) | 4435(2) | 2275(2)  | 74(1)          |

|      |         |         |        |       |
|------|---------|---------|--------|-------|
| C(9) | 2357(4) | 4433(2) | 223(2) | 83(1) |
| C(8) | 2922(4) | 3709(2) | -16(2) | 77(1) |

---

Table 3. Bond lengths [Å] and angles [deg] for A.

---

|              |          |
|--------------|----------|
| O-C(2)       | 1.335(2) |
| O-C(1)       | 1.444(3) |
| N(2)-C(2)    | 1.328(3) |
| N(2)-C(3)    | 1.353(3) |
| C(19)-C(20)  | 1.418(3) |
| C(19)-C(32)  | 1.425(3) |
| C(19)-C(3)   | 1.499(3) |
| C(3)-N(3)    | 1.338(3) |
| C(2)-N(1)    | 1.337(3) |
| N(3)-C(4)    | 1.347(3) |
| C(20)-C(25)  | 1.440(3) |
| C(20)-C(21)  | 1.428(3) |
| N(1)-C(4)    | 1.338(3) |
| C(27)-C(26)  | 1.396(3) |
| C(27)-C(32)  | 1.440(3) |
| C(27)-C(28)  | 1.427(3) |
| C(4)-C(5)    | 1.491(3) |
| C(31)-C(30)  | 1.362(3) |
| C(31)-C(32)  | 1.429(3) |
| C(31)-H(31A) | 0.9300   |
| C(5)-C(6)    | 1.404(3) |
| C(5)-C(18)   | 1.414(3) |
| C(25)-C(26)  | 1.391(3) |
| C(25)-C(24)  | 1.430(3) |
| C(26)-H(26A) | 0.9300   |
| C(18)-C(17)  | 1.424(4) |
| C(18)-C(13)  | 1.436(3) |
| C(28)-C(29)  | 1.353(4) |
| C(28)-H(28A) | 0.9300   |
| C(22)-C(21)  | 1.359(3) |
| C(22)-C(23)  | 1.418(3) |
| C(22)-H(22A) | 0.9300   |
| C(24)-C(23)  | 1.347(3) |
| C(24)-H(24A) | 0.9300   |
| C(6)-C(7)    | 1.429(4) |
| C(6)-C(11)   | 1.440(3) |
| C(13)-C(12)  | 1.393(4) |

|                   |            |
|-------------------|------------|
| C(13)-C(14)       | 1.435(4)   |
| C(11)-C(12)       | 1.399(4)   |
| C(11)-C(10)       | 1.429(4)   |
| C(29)-C(30)       | 1.415(3)   |
| C(29)-H(29A)      | 0.9300     |
| C(21)-H(21A)      | 0.9300     |
| C(30)-H(30A)      | 0.9300     |
| C(23)-H(23A)      | 0.9300     |
| C(17)-C(16)       | 1.365(4)   |
| C(17)-H(17A)      | 0.9300     |
| C(7)-C(8)         | 1.360(4)   |
| C(7)-H(7A)        | 0.9300     |
| C(14)-C(15)       | 1.353(5)   |
| C(14)-H(14A)      | 0.9300     |
| C(12)-H(12A)      | 0.9300     |
| C(1)-H(1A)        | 0.9600     |
| C(1)-H(1B)        | 0.9600     |
| C(1)-H(1C)        | 0.9600     |
| C(10)-C(9)        | 1.360(4)   |
| C(10)-H(10A)      | 0.9300     |
| C(15)-C(16)       | 1.402(4)   |
| C(15)-H(15A)      | 0.9300     |
| C(16)-H(16A)      | 0.9300     |
| C(9)-C(8)         | 1.410(4)   |
| C(9)-H(9A)        | 0.9300     |
| C(8)-H(8A)        | 0.9300     |
| C(2)-O-C(1)       | 118.17(18) |
| C(2)-N(2)-C(3)    | 114.13(19) |
| C(20)-C(19)-C(32) | 121.29(19) |
| C(20)-C(19)-C(3)  | 119.1(2)   |
| C(32)-C(19)-C(3)  | 119.6(2)   |
| N(3)-C(3)-N(2)    | 124.85(19) |
| N(3)-C(3)-C(19)   | 118.0(2)   |
| N(2)-C(3)-C(19)   | 117.17(19) |
| N(2)-C(2)-N(1)    | 126.7(2)   |
| N(2)-C(2)-O       | 119.5(2)   |
| N(1)-C(2)-O       | 113.72(19) |
| C(3)-N(3)-C(4)    | 114.98(19) |
| C(19)-C(20)-C(25) | 118.7(2)   |
| C(19)-C(20)-C(21) | 123.8(2)   |
| C(25)-C(20)-C(21) | 117.5(2)   |
| C(2)-N(1)-C(4)    | 114.09(18) |
| C(26)-C(27)-C(32) | 119.3(2)   |
| C(26)-C(27)-C(28) | 121.5(2)   |



|                    |            |
|--------------------|------------|
| C(32)-C(27)-C(28)  | 119.2(2)   |
| N(1)-C(4)-N(3)     | 125.2(2)   |
| N(1)-C(4)-C(5)     | 116.80(18) |
| N(3)-C(4)-C(5)     | 118.0(2)   |
| C(30)-C(31)-C(32)  | 122.0(2)   |
| C(30)-C(31)-H(31A) | 119.0      |
| C(32)-C(31)-H(31A) | 119.0      |
| C(6)-C(5)-C(18)    | 121.1(2)   |
| C(6)-C(5)-C(4)     | 120.2(2)   |
| C(18)-C(5)-C(4)    | 118.8(2)   |
| C(27)-C(32)-C(31)  | 116.8(2)   |
| C(27)-C(32)-C(19)  | 118.7(2)   |
| C(31)-C(32)-C(19)  | 124.6(2)   |
| C(26)-C(25)-C(20)  | 119.5(2)   |
| C(26)-C(25)-C(24)  | 121.4(2)   |
| C(20)-C(25)-C(24)  | 119.0(2)   |
| C(25)-C(26)-C(27)  | 122.5(2)   |
| C(25)-C(26)-H(26A) | 118.7      |
| C(27)-C(26)-H(26A) | 118.7      |
| C(5)-C(18)-C(17)   | 122.8(2)   |
| C(5)-C(18)-C(13)   | 119.6(3)   |
| C(17)-C(18)-C(13)  | 117.6(3)   |
| C(29)-C(28)-C(27)  | 121.6(2)   |
| C(29)-C(28)-H(28A) | 119.2      |
| C(27)-C(28)-H(28A) | 119.2      |
| C(21)-C(22)-C(23)  | 120.4(2)   |
| C(21)-C(22)-H(22A) | 119.8      |
| C(23)-C(22)-H(22A) | 119.8      |
| C(23)-C(24)-C(25)  | 121.0(2)   |
| C(23)-C(24)-H(24A) | 119.5      |
| C(25)-C(24)-H(24A) | 119.5      |
| C(5)-C(6)-C(7)     | 122.7(2)   |
| C(5)-C(6)-C(11)    | 119.3(3)   |
| C(7)-C(6)-C(11)    | 118.0(3)   |
| C(12)-C(13)-C(14)  | 122.5(3)   |
| C(12)-C(13)-C(18)  | 118.5(3)   |
| C(14)-C(13)-C(18)  | 119.0(3)   |
| C(12)-C(11)-C(10)  | 123.0(3)   |
| C(12)-C(11)-C(6)   | 118.7(3)   |
| C(10)-C(11)-C(6)   | 118.3(3)   |
| C(28)-C(29)-C(30)  | 119.8(3)   |
| C(28)-C(29)-H(29A) | 120.1      |
| C(30)-C(29)-H(29A) | 120.1      |
| C(22)-C(21)-C(20)  | 121.5(2)   |

|                    |          |
|--------------------|----------|
| C(22)-C(21)-H(21A) | 119.3    |
| C(20)-C(21)-H(21A) | 119.3    |
| C(31)-C(30)-C(29)  | 120.6(3) |
| C(31)-C(30)-H(30A) | 119.7    |
| C(29)-C(30)-H(30A) | 119.7    |
| C(24)-C(23)-C(22)  | 120.6(2) |
| C(24)-C(23)-H(23A) | 119.7    |
| C(22)-C(23)-H(23A) | 119.7    |
| C(16)-C(17)-C(18)  | 121.5(3) |
| C(16)-C(17)-H(17A) | 119.2    |
| C(18)-C(17)-H(17A) | 119.2    |
| C(8)-C(7)-C(6)     | 121.5(3) |
| C(8)-C(7)-H(7A)    | 119.3    |
| C(6)-C(7)-H(7A)    | 119.3    |
| C(15)-C(14)-C(13)  | 120.3(3) |
| C(15)-C(14)-H(14A) | 119.8    |
| C(13)-C(14)-H(14A) | 119.8    |
| C(13)-C(12)-C(11)  | 122.9(3) |
| C(13)-C(12)-H(12A) | 118.6    |
| C(11)-C(12)-H(12A) | 118.6    |
| O-C(1)-H(1A)       | 109.5    |
| O-C(1)-H(1B)       | 109.5    |
| H(1A)-C(1)-H(1B)   | 109.5    |
| O-C(1)-H(1C)       | 109.5    |
| H(1A)-C(1)-H(1C)   | 109.5    |
| H(1B)-C(1)-H(1C)   | 109.5    |
| C(9)-C(10)-C(11)   | 121.3(3) |
| C(9)-C(10)-H(10A)  | 119.3    |
| C(11)-C(10)-H(10A) | 119.3    |
| C(14)-C(15)-C(16)  | 121.3(3) |
| C(14)-C(15)-H(15A) | 119.3    |
| C(16)-C(15)-H(15A) | 119.3    |
| C(17)-C(16)-C(15)  | 120.2(3) |
| C(17)-C(16)-H(16A) | 119.9    |
| C(15)-C(16)-H(16A) | 119.9    |
| C(10)-C(9)-C(8)    | 120.4(3) |
| C(10)-C(9)-H(9A)   | 119.8    |
| C(8)-C(9)-H(9A)    | 119.8    |
| C(7)-C(8)-C(9)     | 120.5(3) |
| C(7)-C(8)-H(8A)    | 119.7    |
| C(9)-C(8)-H(8A)    | 119.7    |

---

Symmetry transformations used to generate equivalent atoms:

Table 4. Anisotropic displacement parameters ( $\text{\AA}^2 \times 10^3$ ) for A. The anisotropic displacement factor exponent takes the form:  $-2 \pi^2 [ h^2 a^{*2} U_{11} + \dots + 2 h k a^* b^* U_{12}$

|       | U11    | U22   | U33    | U23    | U13   | U12    |
|-------|--------|-------|--------|--------|-------|--------|
| O     | 72(1)  | 44(1) | 46(1)  | 10(1)  | 19(1) | 0(1)   |
| N(2)  | 43(1)  | 44(1) | 32(1)  | -1(1)  | 7(1)  | 1(1)   |
| C(19) | 43(2)  | 40(1) | 31(1)  | -4(1)  | 11(1) | -4(1)  |
| C(3)  | 37(1)  | 43(1) | 31(1)  | -2(1)  | 6(1)  | 2(1)   |
| C(2)  | 43(2)  | 42(1) | 34(1)  | 2(1)   | 7(1)  | -1(1)  |
| N(3)  | 54(1)  | 44(1) | 35(1)  | 1(1)   | 18(1) | 5(1)   |
| C(20) | 47(2)  | 42(1) | 33(1)  | -4(1)  | 11(1) | -2(1)  |
| N(1)  | 56(1)  | 45(1) | 40(1)  | 2(1)   | 21(1) | 0(1)   |
| C(27) | 44(2)  | 47(2) | 43(2)  | -8(1)  | 15(1) | -4(1)  |
| C(4)  | 46(2)  | 43(1) | 34(1)  | -4(1)  | 12(1) | 0(1)   |
| C(31) | 46(2)  | 59(2) | 47(2)  | -2(1)  | 11(1) | 6(1)   |
| C(5)  | 63(2)  | 41(1) | 38(1)  | 2(1)   | 28(1) | 6(1)   |
| C(32) | 44(2)  | 41(1) | 38(1)  | -4(1)  | 11(1) | 0(1)   |
| C(25) | 52(2)  | 47(1) | 33(1)  | 0(1)   | 14(1) | -4(1)  |
| C(26) | 57(2)  | 59(2) | 41(2)  | -6(1)  | 24(1) | -6(1)  |
| C(18) | 73(2)  | 39(1) | 43(1)  | 1(1)   | 28(1) | 3(1)   |
| C(28) | 51(2)  | 66(2) | 63(2)  | -9(2)  | 25(2) | 1(2)   |
| C(22) | 52(2)  | 66(2) | 45(2)  | 6(1)   | 4(1)  | 5(1)   |
| C(24) | 73(2)  | 61(2) | 32(1)  | -1(1)  | 15(1) | -6(2)  |
| C(6)  | 60(2)  | 45(2) | 50(2)  | 3(1)   | 28(1) | 4(1)   |
| C(13) | 92(2)  | 49(2) | 57(2)  | -3(1)  | 38(2) | 2(2)   |
| C(11) | 72(2)  | 52(2) | 68(2)  | 9(2)   | 43(2) | 17(2)  |
| C(29) | 41(2)  | 67(2) | 83(2)  | -10(2) | 19(2) | 3(1)   |
| C(21) | 51(2)  | 60(2) | 38(1)  | 0(1)   | 13(1) | 5(1)   |
| C(30) | 48(2)  | 64(2) | 56(2)  | -1(1)  | -1(1) | 6(1)   |
| C(23) | 70(2)  | 69(2) | 37(2)  | 9(1)   | 3(1)  | 0(2)   |
| C(17) | 80(2)  | 52(2) | 52(2)  | -2(1)  | 26(2) | -4(2)  |
| C(7)  | 59(2)  | 51(2) | 77(2)  | 7(2)   | 28(2) | 6(2)   |
| C(14) | 127(3) | 53(2) | 73(2)  | -20(2) | 41(2) | -12(2) |
| C(12) | 108(3) | 46(2) | 72(2)  | -5(2)  | 49(2) | 11(2)  |
| C(1)  | 86(2)  | 44(2) | 72(2)  | 11(1)  | 14(2) | 3(2)   |
| C(10) | 89(3)  | 68(2) | 100(3) | 17(2)  | 57(2) | 29(2)  |
| C(15) | 118(3) | 74(2) | 76(2)  | -18(2) | 24(2) | -26(2) |
| C(16) | 84(2)  | 74(2) | 65(2)  | -8(2)  | 17(2) | -18(2) |
| C(9)  | 62(2)  | 83(2) | 113(3) | 30(2)  | 37(2) | 25(2)  |
| C(8)  | 61(2)  | 68(2) | 106(3) | 18(2)  | 24(2) | 8(2)   |

Table 5. Hydrogen coordinates ( $\times 10^4$ ) and isotropic displacement parameters ( $\text{\AA}^2 \times 10^3$ )

for

A.

|        | x     | y    | z     | U(eq) |
|--------|-------|------|-------|-------|
| H(31A) | 12225 | 1429 | 510   | 61    |
| H(26A) | 12118 | 1969 | -2397 | 61    |
| H(28A) | 14658 | 1326 | -1650 | 69    |
| H(22A) | 5549  | 3145 | -2255 | 66    |
| H(24A) | 9581  | 2569 | -3190 | 66    |
| H(29A) | 16099 | 835  | -528  | 75    |
| H(21A) | 6932  | 2736 | -1088 | 59    |
| H(30A) | 14871 | 896  | 562   | 69    |
| H(23A) | 6891  | 3064 | -3310 | 71    |
| H(17A) | 10780 | 3492 | 1632  | 71    |
| H(7A)  | 4902  | 2978 | 84    | 73    |
| H(14A) | 8856  | 5858 | 2447  | 98    |
| H(12A) | 5939  | 5585 | 1687  | 85    |
| H(1A)  | 8765  | -105 | 1693  | 101   |
| H(1B)  | 10143 | 304  | 1304  | 101   |
| H(1C)  | 8329  | 101  | 824   | 101   |
| H(10A) | 3045  | 5366 | 876   | 97    |
| H(15A) | 11612 | 5462 | 2850  | 106   |
| H(16A) | 12589 | 4285 | 2444  | 89    |
| H(9A)  | 1238  | 4600 | 40    | 100   |
| H(8A)  | 2171  | 3400 | -356  | 93    |

#### 4. Theoretical calculations of TAT at B3LYP/6-31G(d) level

Electronic structure calculations were carried out with the B3LYP functional and 6-31G(d) basis set for all atoms. For each stationary point, harmonic frequencies were computed at the fully optimized geometries, which allowed the assignment of the structures as minima. Absorption spectra were computed considering the fifty vertical excitations from the ground state by using time-dependent density functional linear response theory (TDDFT) in conjunction with a conductor-like polarizable continuum model (CPCM),<sup>[S3,S4]</sup> which has been proved to give the better results for common organic compounds. All these calculations were performed with Gaussian 03.<sup>[S5]</sup>

Reference:

- [S1] Suffert, J. *J. Org. Chem.* **1989**, *54*, 509-510.  
[S2] Birks, J. B.; *Photophysics of Aromatic Molecules*, John Wiley & Sons Ltd.: New York, **1970**.  
[S3] Barone V.; Cossi, M. *J. Phys. Chem. A*, **1998**, *102*, 1995-2001.  
[S4] Cossi, M.; Rega, N.; Scalmani, G.; Barone, V. *J. Comp. Chem.*, **2003**, *24*, 669-81  
[S5] Frisch, G.W.T.M.J.; Schlegel, H.B.; Scuseria, G.E.; Robb, M.A.; Cheeseman, J.R.;

Montgomery, J.A.; Vreven, Jr., T.; Kudin, K.N.; Burant, J.C.; Millam, J.M.; Iyengar, S.S.; Tomasi, J.; Barone, V.; Mennucci, B.; Cossi, M.; Scalmani, G.; Rega, N.; Petersson, G.A.; Nakatsuji, H.; Hada, M.; Ehara, M.; Toyota, K.; Fukuda, R.; Hasegawa, J.; Ishida, M.; Nakajima, T.; Honda, Y.; Kitao, O.; Nakai, H.; Klene, M.; Li, X.; Knox, J.E.; Hratchian, H.P.; Cross, J.B.; Adamo, C.; Jaramillo, J.; Gomperts, R.; Stratmann, R.E.; Yazyev, O.; Austin, A.J.; Cammi, R.; Pomelli, C.; Ochterski, J.W.; Ayala, P.Y.; Morokuma, K.; Voth, G.A.; Salvador, P.; Dannenberg, J.J.; Zakrzewski, V.G.; Dapprich, S.; Daniels, A.D.; Strain, M.C.; Farkas, O.; Malick, D.K.; Rabuck, A.D.; Raghavachari, K.; Foresman, J.B.; Ortiz, J.V.; Cui, Q.; Baboul, A.G.; Clifford, S.; Cioslowski, J.; Stefanov, B.B.; Liu, G.; Liashenko, A.; Piskorz, P.; Komaromi, I.; Martin, R.L.; Fox, D.J.; Keith, T.; Al-Laham, M.A.; Peng, C.Y.; Nanayakkara, A.; Challacombe, M.; Gill, P.M.W.; Johnson, B.; Chen, W.; Wong, M.W.; Gonzalez, C.; Pople, J.A.; Gaussian 03W, Revision C.02, Gaussian, Inc., Wallingford, CT, 2004.
